# Supplementary material for: The Swiss common garden network: testing assisted migration of tree species in Europe
Source: Frontiers journal article supplement (doi:10.3389/ffgc.2024.1396798), 2024-06-25
Supplement: Table_2.XLSX [file Table_2.XLSX]

## Sheet: list of seed sources
Species	Country	Seed sources	Registry number	Latitude	Longitude	Elevation (m a.s.l.)	Seed provider	Nursery
Abies alba	Switzerland	Chur, Känzeli	NKS 1653	46.84	9.52	1250	Forstgarten - Rodels	Forstgarten - Rodels
Abies alba	Switzerland	Hägendorf, Unterwald	NKS 1916	47.34	7.81	750	Emme Forstbaumschulen AG	Emme Forstbaumschulen AG
Abies alba	Switzerland	Madiswil, Hunze	NKS 174	47.15	7.8	650	Emme Forstbaumschulen AG	Emme Forstbaumschulen AG
Abies alba	Switzerland	Marbach (LU), Wasserfall	NKS 2102	46.86	7.93	1255	Emme Forstbaumschulen AG	Emme Forstbaumschulen AG
Abies alba	Switzerland	Onsernone, Piano delle Cascine	NKS 181	46.24	8.53	1300	Vivaio forestale - Repubblica e Cantone Ticino	Emme Forstbaumschulen AG
Abies alba	Switzerland	Sierre, Ochsenboden, Beauregard	NKS 179	46.28	7.56	1135	Emme Forstbaumschulen AG	Emme Forstbaumschulen AG
Abies alba	Italy	Calabria, Buturo-Taverna	CE/IT/CAL06/17	39.05	16.63	1110	Allasia Plant Magna Grecia S.S.	Allasia Plant Magna Grecia S.S.
Acer opalus	Spain	Pirineo Axial, Gorraíz	ES08				Centro Nacional de Recursos Genéticos Forestales El Serranillo (Guadalajara	Emme Forstbaumschulen AG
Acer opalus	Italy	Monte Caprello	063-16				Centro Nazionale Carabinieri Biodiversità Peri	Emme Forstbaumschulen AG
Acer opalus	Switzerland	Bevaix, Forêt de Bevaix	NKS 1102	46.94	6.8	730	Emme Forstbaumschulen AG	Emme Forstbaumschulen AG
Acer opalus	Switzerland	Liesberg, Meistelberg	NA	47.41	7.44	500	Emme Forstbaumschulen AG	Emme Forstbaumschulen AG
Acer opalus	Switzerland	Plagne, Les Ecovots	NKS 541	47.19	7.28	900	Forstgarten - Lobsigen	Emme Forstbaumschulen AG
Acer opalus	Switzerland	Aven, Conthey	NKS 2112	46.23	7.26	1000	Emme Forstbaumschulen AG	Emme Forstbaumschulen AG
Acer platanoides	Italy	Baraccone	SR 0055-PIE				Centro Nazionale Carabinieri Biodiversità Peri	Emme Forstbaumschulen AG
Acer platanoides	Switzerland	Twann, St. Petersinsel	NKS 1318	47.07	7.14	450	Forstgarten - Lobsigen	Forstgarten - Lobsigen
Acer platanoides	France	Morschwiller	APL-901-Nord SI	48.82	7.63		VILMORIN Semences d'arbres - Pépiniéristes	Emme Forstbaumschulen AG
Acer platanoides	Switzerland	Fully, Les Follatères, Fôret de la Lui	NA	46.13	7.08	700	Emme Forstbaumschulen AG	Emme Forstbaumschulen AG
Acer platanoides	Switzerland	Münchenstein, Bruderholzrain	NKS 1731	47.52	7.6	310	Emme Forstbaumschulen AG	Emme Forstbaumschulen AG
Acer platanoides	Switzerland	Hägendorf, Armenbünten	NKS 1276	47.34	7.84	555	Emme Forstbaumschulen AG	Emme Forstbaumschulen AG
Acer platanoides	Switzerland	Hausen am Albis, Ebertswilerholz	NKS 958	47.23	8.56	670	Versuchsgarten - WSL	Emme Forstbaumschulen AG
Acer pseudoplat.	Austria	Niederfellabrunn	B.Ah3(8.1/ko:100-350m)	48.45	16.32	300	Forstpflanzen - Herzog Samen	Emme Forstbaumschulen AG
Acer pseudoplat.	Spain	Esteribar	ES-576-RIU08 / FS-576/08/31/001	43.01	-1.31	790	Centro Nacional de Recursos Genéticos Forestales El Serranillo (Guadalajara	Emme Forstbaumschulen AG
Acer pseudoplat.	Switzerland	Leuk, Tschingere	NKS 4386	46.25	7.47	1000	Emme Forstbaumschulen AG	Emme Forstbaumschulen AG
Acer pseudoplat.	Switzerland	Flims, Waldhaus	NKS 1242	46.82	9.28	1100	Forstgarten - Rodels	Emme Forstbaumschulen AG
Acer pseudoplat.	Switzerland	Grenchen, Grenchenberg, Vor der Egg	NKS 1425	47.22	7.37	1225	Emme Forstbaumschulen AG	Emme Forstbaumschulen AG
Acer pseudoplat.	Switzerland	Cortébert, Cuisinière	NKS 2281	47.17	7.13	1150	Forstgarten - Lobsigen	Emme Forstbaumschulen AG
Acer pseudoplat.	Switzerland	Guggisberg, Weisstanngrat	NKS 4368	46.7	7.36	1390	Forstgarten - Lobsigen	Emme Forstbaumschulen AG
Cedrus atlantica	France	Ménerbes	CAT-PP-001	43.83	5.32	660	VILMORIN Semences d'arbres - Pépiniéristes	Emme Forstbaumschulen AG
Cedrus atlantica	France	Bédoin	CAT-900-007	44.13	5.27	885	VILMORIN Semences d'arbres - Pépiniéristes	Emme Forstbaumschulen AG
Cedrus atlantica	France	Mirabel	CAT-900-013	44.61	4.52	650	VILMORIN Semences d'arbres - Pépiniéristes	Emme Forstbaumschulen AG
Cedrus atlantica	France	Mont Ventoux	CAT-PP-002	44.12	5.19	855	VILMORIN Semences d'arbres - Pépiniéristes	Emme Forstbaumschulen AG
Cedrus atlantica	France	Ventouret	CAT-900-022	44.14	5.37	1050	VILMORIN Semences d'arbres - Pépiniéristes	Emme Forstbaumschulen AG
Corylus colurna	Bulgaria	Byala	NA	42.73	25.49	110	Local forest manager	Emme Forstbaumschulen AG
Corylus colurna	Turkey	Bolu	NA	40.87	31.8	1050	Die Nordmänner – DKV Gütegemeinschaft für forstliches Vermehrungsgut e.V. (dkv-net.de)	Emme Forstbaumschulen AG
Corylus colurna	Serbia	Nationalpark Đerdap	NA	44.56	21.97	600	Почетна - Институт за шумарство Београд, Република Србија (forest.org.rs)	Emme Forstbaumschulen AG
Corylus colurna	Hungary	Mixed provenance	NA				Juhász és Társa Kft.	Emme Forstbaumschulen AG
Corylus colurna	Turkey	Seben Taschajama	NA				Die Nordmänner – DKV Gütegemeinschaft für forstliches Vermehrungsgut e.V. (dkv-net.de)	Emme Forstbaumschulen AG
Fagus sylvatica	France	Massif Central, NRD Haute Alt	FSY-402				VILMORIN Semences d'arbres - Pépiniéristes	Emme Forstbaumschulen AG
Fagus sylvatica	Slovakia	Stredoslovenska	fsy214MA-050	49.48	17.3	530	OZ SEMENOLES	Emme Forstbaumschulen AG
Fagus sylvatica	Switzerland	Saillon, Le Grand Dévaloir	NA	46.17	7.17	870	Own harvest	Emme Forstbaumschulen AG
Fagus sylvatica	Switzerland	Bonaduz	NA	46.82	9.38	700	Forstgarten - Rodels	Emme Forstbaumschulen AG
Fagus sylvatica	Switzerland	Diessenhofen, Buechberg	NKS 1283	47.68	8.72	425	Kressibucher AG	Emme Forstbaumschulen AG
Fagus sylvatica	Switzerland	Capriasca, Monte Bar	NA	46.12	9.03	1300	Vivaio forestale - Repubblica e Cantone Ticino	Emme Forstbaumschulen AG
Fagus sylvatica	Switzerland	Wohlen BE, Weidhusgraben	NKS 429	46.99	7.3	670	Forstgarten - Lobsigen	Emme Forstbaumschulen AG
Juglans regia	India	Chika, Saatgutplantage Obfelden	NA				Own harvest	Emme Forstbaumschulen AG
Juglans regia	Kyrgyzstan	Bulak, Saatgutplantage Obfelden	NA				Own harvest	Emme Forstbaumschulen AG
Juglans regia	India	Dachigam, Saatgutplantage Obfelden	NA				Own harvest	Emme Forstbaumschulen AG
Juglans regia	Switzerland	Selzach, Chänelmoos	NKS 40	47.22	7.46	560	Emme Forstbaumschulen AG	Emme Forstbaumschulen AG
Juglans regia	Switzerland	Blenio	NA	46.5	8.95	840	Vivaio forestale - Repubblica e Cantone Ticino	Emme Forstbaumschulen AG
Juglans regia	Switzerland	Malvaglia	NA	46.41	8.98	370	Vivaio forestale - Repubblica e Cantone Ticino	Emme Forstbaumschulen AG
Larix decidua	Austria	Bergerviertel	AT/Lä38 (4.2/hm: 1200-1450m)	47.67	14.55	1230	Steirische Landesforstgärten - Kraubath	Emme Forstbaumschulen AG
Larix decidua	Slovakia	Podtatranská	lde226PP-312	49.12	20.01	1000	OZ SEMENOLES	Emme Forstbaumschulen AG
Larix decidua	Poland	Prudnik, Md51, Prudnik/377m	MP/1/4608/05			377	Nadleśnictwo Prudnik - Lasy Państwowe	Emme Forstbaumschulen AG
Larix decidua	Switzerland	Madulain, Guarda Val	NKS 1507	46.59	9.93	1770	Forstgarten - Rodels	Forstgarten - Rodels
Larix decidua	Switzerland	Präz, Crusch	NKS 1163	46.75	9.4	1310	Forstgarten - Rodels	Forstgarten - Rodels
Larix decidua	Switzerland	Martigny, Ban des Aiguilles	NKS 575	46.09	7.09	1030	Emme Forstbaumschulen AG	Emme Forstbaumschulen AG
Larix decidua	Switzerland	Leukerbad, Boviriwald, Eggen	NKS 2002	46.36	7.64	1860	Emme Forstbaumschulen AG	Emme Forstbaumschulen AG
Picea abies	Austria	Münichreith	Fi57(9.2/tm:500-750m)	48.27	15.11	700	Murauer Forstpflanzen	Emme Forstbaumschulen AG
Picea abies	Switzerland	Evilard, Morille-Est	NKS 2309	47.15	7.22	850	Emme Forstbaumschulen AG	Emme Forstbaumschulen AG
Picea abies	Switzerland	Burgdorf, Pleerwald West	NKS 443	47.04	7.6	605	Emme Forstbaumschulen AG	Emme Forstbaumschulen AG
Picea abies	Switzerland	Seewis, Cuora	NA	47.01	9.63	1500	Forstgarten - Rodels	Forstgarten - Rodels
Picea abies	Switzerland	Montana, La Grande Zour	NKS 1128	46.3	7.48	1380	Emme Forstbaumschulen AG	Emme Forstbaumschulen AG
Picea abies	Switzerland	Lavizzara, Fusio vacarisch	NA	46.44	8.67	1500	Vivaio forestale - Repubblica e Cantone Ticino	Emme Forstbaumschulen AG
Picea abies	Switzerland	Alpnach, Gschwänt-Fachsboden	NKS 47	46.95	8.19	1405	Emme Forstbaumschulen AG	Emme Forstbaumschulen AG
Pinus sylvestris	Turkey	Amasy, Amasya Vezirköprü	NA	41.14	35.08	1110	Local forest manager	Emme Forstbaumschulen AG
Pinus sylvestris	Bulgaria	Dospat	C02-PSY-08-6-181-1-2	41.63	24.14	1370	Forest seed control station Sofia	Emme Forstbaumschulen AG
Pinus sylvestris	Spain	Camarena	FS-21/13/44/001	40.08	-1.01	1475	Centro Nacional de Recursos Genéticos Forestales El Serranillo (Guadalajara	Emme Forstbaumschulen AG
Pinus sylvestris	Switzerland	Leuk, Bublet	NKS 254	46.32	7.65	990	Emme Forstbaumschulen AG	Emme Forstbaumschulen AG
Pinus sylvestris	Switzerland	Würenlingen, Ibrig	NA	47.52	8.25	500	Emme Forstbaumschulen AG	Emme Forstbaumschulen AG
Pinus sylvestris	Switzerland	Fläsch, Föhreli	NKS 1637	47.02	9.53	600	Forstgarten - Rodels	Emme Forstbaumschulen AG
Pinus sylvestris	Switzerland	Souboz, Droit des Ecorcheresse	NKS 518	47.28	7.27	980	Emme Forstbaumschulen AG	Emme Forstbaumschulen AG
Prunus avium	Hungary	Sarvar-Kald	HU/PRAV-11-651013				Juhász és Társa Kft.	Emme Forstbaumschulen AG
Prunus avium	Italy	Parma, Boschi di Carrega	SR 0023-EMR				Centro Nazionale Carabinieri Biodiversità Peri	Emme Forstbaumschulen AG
Prunus avium	Switzerland	Riedholz, Bännli, Winterhalden	NKS 1416	47.24	7.57	565	Emme Forstbaumschulen AG	Emme Forstbaumschulen AG
Prunus avium	Switzerland	Zollikon	NA	47.35	8.6	580	Kressibucher AG	Emme Forstbaumschulen AG
Prunus avium	Switzerland	Diessenhofen	NKS 1262	47.68	8.72	400	Own harvest	Emme Forstbaumschulen AG
Prunus avium	Switzerland	Mendrisio, Arzo	NA	45.87	8.94	450	Vivaio forestale - Repubblica e Cantone Ticino	Emme Forstbaumschulen AG
Prunus avium	Switzerland	Romont BE, La Joux	NKS 547	47.18	7.32	910	Forstgarten - Lobsigen	Emme Forstbaumschulen AG
Pseudotsuga menz.	United States	Randle	USA/WA 430-30	46.54	-121.96	840	Silvaseed Company	Emme Forstbaumschulen AG
Pseudotsuga menz.	United States	Glacier	USA/WA401-20	48.89	-121.93	535	Silvaseed Company	Emme Forstbaumschulen AG
Pseudotsuga menz.	United States	Snoqualmie Falls	USA/WA 412-15			380	Silvaseed Company	Emme Forstbaumschulen AG
Pseudotsuga menz.	United States	Mineral	USA/WA 422-15			380	Silvaseed Company	Emme Forstbaumschulen AG
Pseudotsuga menz.	Switzerland	Biel, Vorberg	NKS 490	47.16	7.27	675	Emme Forstbaumschulen AG	Emme Forstbaumschulen AG
Pseudotsuga menz.	Switzerland	Tägerwilen, Douglashau, Bruderhau	NKS 4394	47.63	9.12	555	Kressibucher AG	Emme Forstbaumschulen AG
Pseudotsuga menz.	Switzerland	Gränichen, Manzeberg	NKS 989	47.36	8.08	500	Emme Forstbaumschulen AG	Emme Forstbaumschulen AG
Quercus cerris	Switzerland	Monte Barro	NA				Vivaio forestale - Repubblica e Cantone Ticino	Vivaio forestale - Repubblica e Cantone Ticino
Quercus cerris	France	Mixed provenance	QCE901-Nord				La sécherie de la Joux - ONF	Vivaio forestale - Repubblica e Cantone Ticino
Quercus cerris	Bulgaria	Dabovnik, Ludogorie	C02-QCE-02-3-006-1-2	43.69	27.92	250	Forest seed control station Sofia	Vivaio forestale - Repubblica e Cantone Ticino
Quercus cerris	Switzerland	Cademario, Pianacce	NA	46.03	8.89	900	Vivaio forestale - Repubblica e Cantone Ticino	Vivaio forestale - Repubblica e Cantone Ticino
Quercus cerris	Turkey	Canakkale , Karadag	NA	40.12	26.92	390	Local forest manager	Vivaio forestale - Repubblica e Cantone Ticino
Quercus petraea	France	Basin Parisien	QPE-105				La sécherie de la Joux - ONF	Emme Forstbaumschulen AG
Quercus petraea	Spain	Pirineo Navaro	ES07-Selec.-19				Centro Nacional de Recursos Genéticos Forestales El Serranillo (Guadalajara	Emme Forstbaumschulen AG
Quercus petraea	Switzerland	Brusino Arsizio, Serpiano (Monte S. Giorgio)	NA	45.91	8.93	650	Vivaio forestale - Repubblica e Cantone Ticino	Emme Forstbaumschulen AG
Quercus petraea	Switzerland	Galm, Ober Eichelried, Abt. 9-10	NKS 224	46.91	7.17	580	Emme Forstbaumschulen AG	Emme Forstbaumschulen AG
Quercus petraea	Switzerland	Mammern, Mammerner Wald	NKS 2100	47.64	8.95	520	Kressibucher AG	Emme Forstbaumschulen AG
Quercus petraea	Switzerland	Falera, Gonda	NA	46.8	9.24	982	Forstgarten - Rodels	Emme Forstbaumschulen AG
Quercus petraea	Switzerland	Olten, Bannwald	NKS 1422	47.36	7.9	450	Emme Forstbaumschulen AG	Emme Forstbaumschulen AG
Quercus robur	Italy	Monte Fontane	VEN030/VR				Centro Nazionale Carabinieri Biodiversità Peri	Emme Forstbaumschulen AG
Quercus robur	Croatia	Gradiška, Nova Gradiška	HR-QRO-SS-122/275	45.11	17.11	98	HRVATSKI ŠUMARSKI INSTITUT	Emme Forstbaumschulen AG
Quercus robur	Bulgaria	Bezvodit, Ludogorie	C02-QRO-02-3-003-1-2	43.51	27.97	250	Forest seed control station Sofia	Emme Forstbaumschulen AG
Quercus robur	Switzerland	Aristau, Schachen	NKS 1988	47.3	8.38	380	Versuchsgarten - WSL	Emme Forstbaumschulen AG
Quercus robur	Switzerland	Gordola, Bolle di Magadino - Bograsso	NA	46.17	8.86	200	Vivaio forestale - Repubblica e Cantone Ticino	Emme Forstbaumschulen AG
Quercus robur	Switzerland	Marly, Bois de Monteynan	NA	46.76	7.13	685	Emme Forstbaumschulen AG	Emme Forstbaumschulen AG
Quercus robur	Switzerland	Tägerwilen, Schwesterrain	NKS 1232	47.64	9.14	515	Kressibucher AG	Emme Forstbaumschulen AG
Sorbus torminalis	Switzerland	Riehen, Mittelberg	NKS 1884	47.58	7.67	390	Local forest manager	Emme Forstbaumschulen AG
Sorbus torminalis	Spain	Alcarrias	ES21 R.I 21-18	40.53	-2.73	909	Centro Nacional de Recursos Genéticos Forestales El Serranillo (Guadalajara	Versuchsgarten - WSL
Sorbus torminalis	France	Valay, Forêt communale de Valay	STO-5-901-012	47.33	5.63		La sécherie de la Joux - ONF	Versuchsgarten - WSL
Sorbus torminalis	France	Boulogne, Forêt de Boulogne	STO-5-901-003				La sécherie de la Joux - ONF	Versuchsgarten - WSL
Sorbus torminalis	Italy	Marostica, Monte Sedea	NA				Centro Nazionale Carabinieri Biodiversità Peri	Versuchsgarten - WSL
Sorbus torminalis	Poland	Rezerwacie Kawęczyńskie Brzęki Poznan, Syców Arboretum	NA	51.266	17.678	200	Arboretum Leśne - Lasy Państwowe	Versuchsgarten - WSL
Sorbus torminalis	Switzerland	Schaffhausen, Gwölb	NKS 833	47.73	8.69	465	Versuchsgarten - WSL	Versuchsgarten - WSL
Tilia cordata	Italy	Valmorel, Limana	VEN112				Centro Nazionale Carabinieri Biodiversità Peri	Emme Forstbaumschulen AG
Tilia cordata	France	Île de France	TCO130 OUEST				VILMORIN Semences d'arbres - Pépiniéristes	Emme Forstbaumschulen AG
Tilia cordata	Switzerland	Quarten, Murg, Allmeind	NKS 43	47.11	9.21	550	Versuchsgarten - WSL	Emme Forstbaumschulen AG
Tilia cordata	Switzerland	Breggia, Scudellate	NA	45.92	9.04	930	Vivaio forestale - Repubblica e Cantone Ticino	Emme Forstbaumschulen AG
Tilia cordata	Switzerland	Wünnewil, Senseau	NKS 312	46.89	7.33	545	Emme Forstbaumschulen AG	Emme Forstbaumschulen AG
Tilia cordata	Switzerland	Schwanden, Ballenberg	NKS 773	46.75	8.08	680	Emme Forstbaumschulen AG	Emme Forstbaumschulen AG

## Sheet: description
Column header	Explanation
Species	Tree species
Country	Abbreviation of country name of provenance (seed origin)
Provenance	Location in which seed source or stand of trees is growing
Registry number	Registry number of provenance following OECD standards whenever applicable (OECD Forest Seed and Plant Scheme, 2019). NA = no information on registry number available. For Switzerland: NKS refers to the Swiss national cadastre of forest reproductive material (Nationaler Samenerntekataster, (BAFU, 2019)).
Latitude	Latitude in global WGS84 coordinates
Longitude	Longitude in global WGS84 coordinates
Elevation (m a.s.l.)	Elevation of provenance
Seed provider	nursery from which the seeds have been obtained
Nursery	nursery where the seedlings have been optained for planting
List of references
OECD Forest Seed and Plant Scheme (2019)	OECD Scheme for the Control of Forest Reproductive Material Moving in International Trade, Paris, France. https://www.oecd.org/agriculture/forest/documents/forest-scheme-rules-and-regulations.pdf
BAFU (2019)	BAFU (2019) Nationaler Kataster der Samenerntebestände NKS. https://www.nks.admin.ch.

## Sheet: list of seed providers
Country	Seed provider	Weblink
Austria	Herzog.Baum Samen und Pflanzen GmbH, Koaserbauerstrasse 10, 4810 Gmunden	https://www.herzog-samen.com/
Austria	Murauer Forstpflanzen GmbH, Hübing 24, A-4974 Ort/Innkreis, Österreich	http://www.murauer-forstpflanzen.at/
Austria	Steirischer Landesforstgarten, Wolfersbachweg 2, 8714 Kraubath, Österreich	https://forstgarten.at/company/
Bulgaria	Forest Seed Control Station, 5 Iskarsko shose street, 1528 Sofia	http://www.gsssofia.iag.bg/docs/lang/2/cat/7/index
Bulgaria	Forstamt Byala, Bulgaria
Croatia	Hrvatski šumarski institute, Cvjetno naselje 41, 10450 Jastrebarsko	https://www.sumins.hr/
France	Office National des Forêts, Sécherie de la Joux, Montrainçon, 39300 Supt	https://www.onf.fr/onf/+/68b::secherie-de-la-joux.html
France	Vilmorin SA, Route du Manoir, 49250, La Menitre	https://www.vilmorin-semences-arbres.com/
Hungary	Juhász és Társa Kft., Tulipán köz 12/A, 9400 Sopron, Ungarn	http://www.juhasz-mag.hu/hu/welcome.html
Italy	Reparto Carabinieri per la Biodiversità di Verona, Centro Nazionale Biodiversità di Peri, Via del Ponte, 256, 37020 Peri di dolcé, VR	https://rgpbio.it/cncb/peri/
Italy	Vivaio Allasia, Loc. S. Margherita di Calabria, 88049 Soveria Mannelli, CZ	https://allasiaplantmg.it/
Poland	Arboretum Leśne im.Prof.S.Białoboka, przy Nadleśnictwie Syców, ul. Leśna 6, Stradomia Dolna, 56-504 Dziadowa Kłoda	https://arboretumlesne.poznan.lasy.gov.pl/regulamin-obiektu
Poland	Nadleśnictwo Prudnik, ul. Dąbrowskiego 34, 48-200 Prudnik	https://prudnik.katowice.lasy.gov.pl/nadlesnictwo
Serbia	Institut of Forestry, Kneza Viseslava 3, 11000 Belgrade, Serbien	https://www.forest.org.rs/
Slovakia	Lesy SR, š. p., OZ Semenoles, Pri Železnici 52, 033 01 Liptovský Hrádok, Slovensko	https://www.semenoles.sk/
Spain	Centro de Recursos Genéticos Forestales El Serranillo, Ctra. Fontanar, s/n. - km 2, 19004, Guadalajara	https://www.miteco.gob.es/es/biodiversidad/temas/recursos-geneticos/geneticos-forestales/rgf_red_centros_serranillo_mejora.html
Switzerland	Emme Forstbaumschulen AG, Schachen 9, 3428 Wiler bei Utzenstorf	https://www.emme-forstbaumschulen.ch/
Switzerland	Forstbaumschule Kressibucher AG, Ast 2, 8572 Berg	https://kressibucher.ch/
Switzerland	Forstgarten Lobsigen, Schiffacker 1, 3268 Lobsigen	https://www.weu.be.ch/de/start/themen/umwelt/wald/informationen-waldbesitzer-innen/forstpflanzen-bestellen.html
Switzerland	Forstgarten Rodels, 7415 Rodels	https://www.gr.ch/DE/institutionen/verwaltung/diem/awn/wald/3_4_waldoekologie/3_3_2_forstgarten/Seiten/default.aspx
Switzerland	Versuchsgarten Eidg. Forschungsanstalt WSL	https://www.wsl.ch/de/ueber-die-wsl/versuchsanlagen-und-labors/versuchsgarten/
Switzerland	Vivaio Forestale Cantonale, Lattecaldo 4, 6835 Morbio Superiore	https://www4.ti.ch/dt/da/sf/utf/temi/vivaio-forestale/tema/tema
Turkey	Ana Orman Mamüller Thumculuk Ve Üretim Dis Ticaret Ltd.	https://dkv-net.de/die-nordmaenner/
Turkey	Dr. Said Dağdaş, Orman Genel Müdürlüğü, 3. Kat Oda Nu: 3225, 06560 Söğütözü, Beştepe-Yenimahalle, Ankara
US	Silvaseed Company, Foresters, PO Box 118, Roy, WA 98580	https://silvaseed.com/
